# Supplementary material for: Disturbed mitochondrial quality control involved in hepatocytotoxicity induced by silica nanoparticles
Source: Royal Society of Chemistry journal article supplement (doi:10.1039/d0nr01893g), 2020-01-01
Supplement: d0nr01893g1.pdf [file d0nr01893g1.pdf]

## Supplementary Material

**Table S1 The ratio of SiNPs dosage *in vitro* to *in vivo***

| In vitro (mg/10 <sup>9</sup> cell) | In vivo (mg/10 <sup>9</sup> cell) <sup>a</sup> | Ratio  |
|------------------------------------|------------------------------------------------|--------|
| 100 <sup>b</sup>                   | 0.18 <sup>c</sup>                              | 555.56 |
| 100 <sup>b</sup>                   | 1.32 <sup>d</sup>                              | 75.76  |

a: the predicted concentration of SiNPs in liver corresponds to the detected SiNPs deposition in postmortem human liver samples, assuming human liver with the average weight of 1.5 kg and  $2.5 \times 10^9$  hepatocytes;

b: the actual *in vitro* SiNPs concentration of 100 µg/mL corresponds to 100 mg/10<sup>9</sup> cells, calculated by the actual exposure volume of particle suspension in culture dish (10 mL) and the total cell number ( $1 \times 10^7$ );

c: 0.3 mg/kg SiNPs deposition in human liver assumed;

d: 2.2 mg/kg SiNPs deposition in human liver assumed.



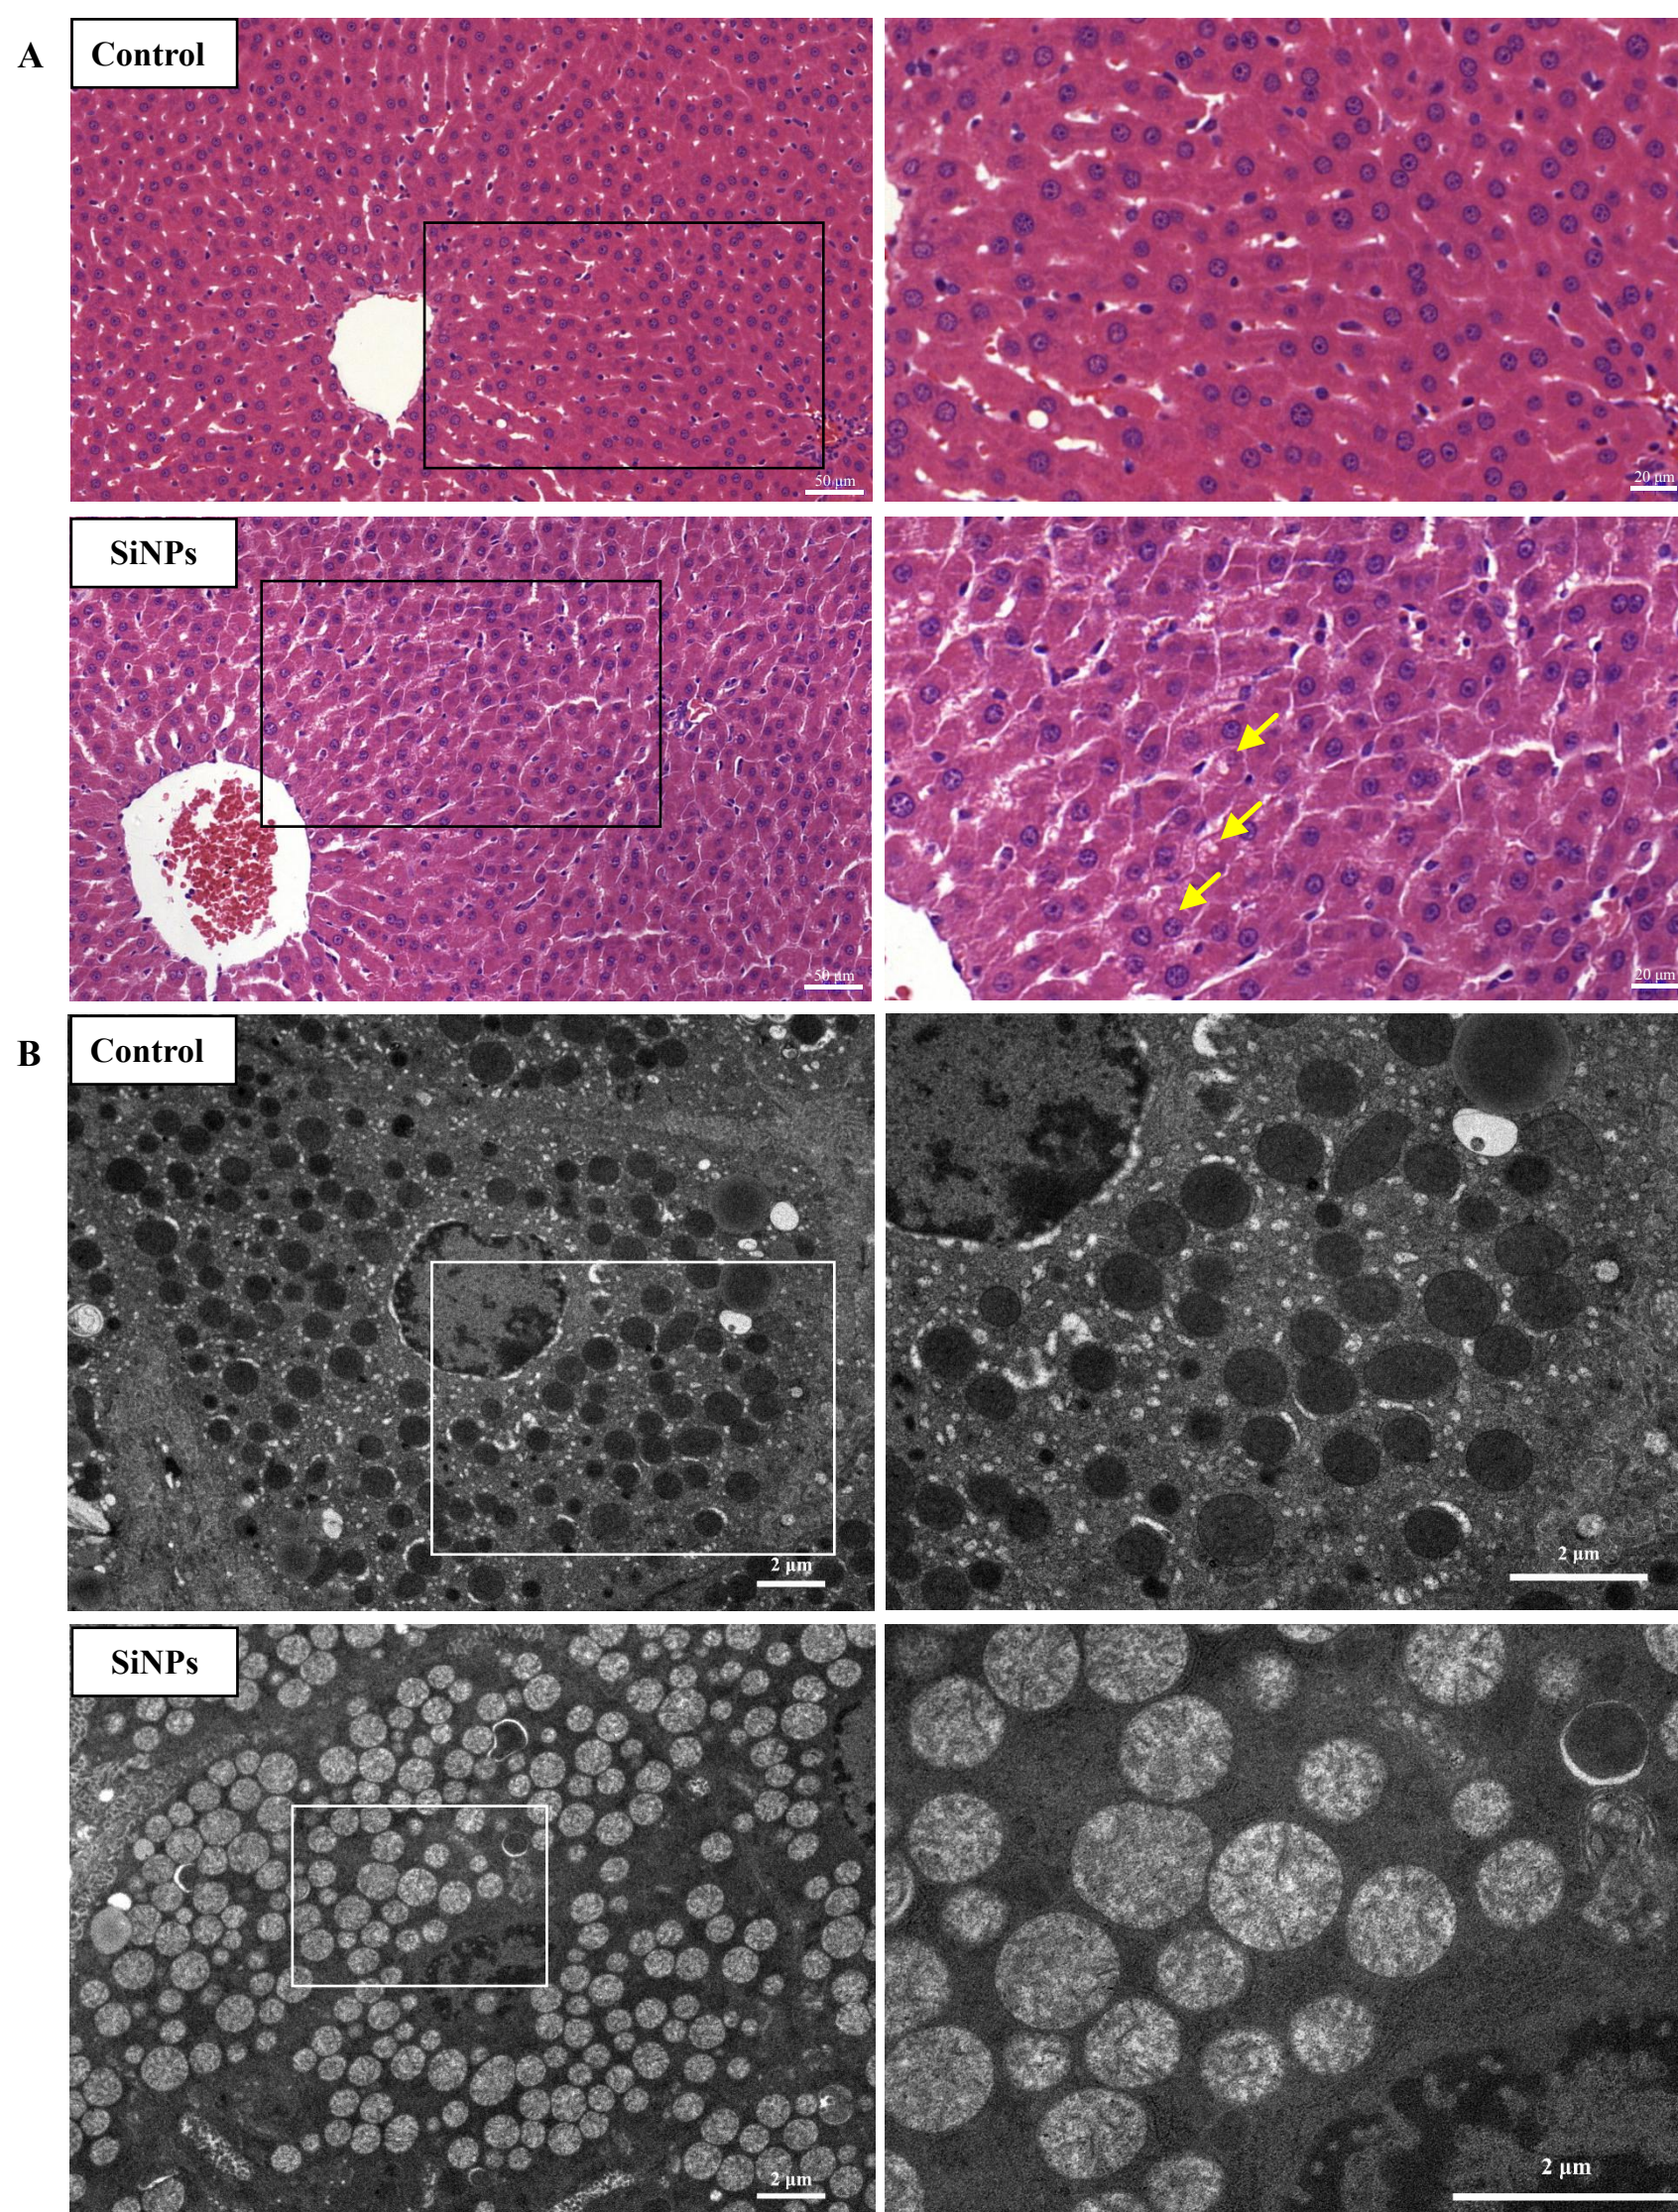

Fig. S1. HE staining and TEM images of the liver tissue exposed to SiNPs.(A) Representative HE images of the Control and SiNPs-exposed liver were obtained from three rats in each group. The scale bar indicates 50 and 20  $\mu\text{m}$ . The inset at a higher magnification shows the degeneration of hepatocytes (yellow arrows). (B) Representative TEM images of the Control and SiNPs-treated liver indicated a severe mitochondrial damage.



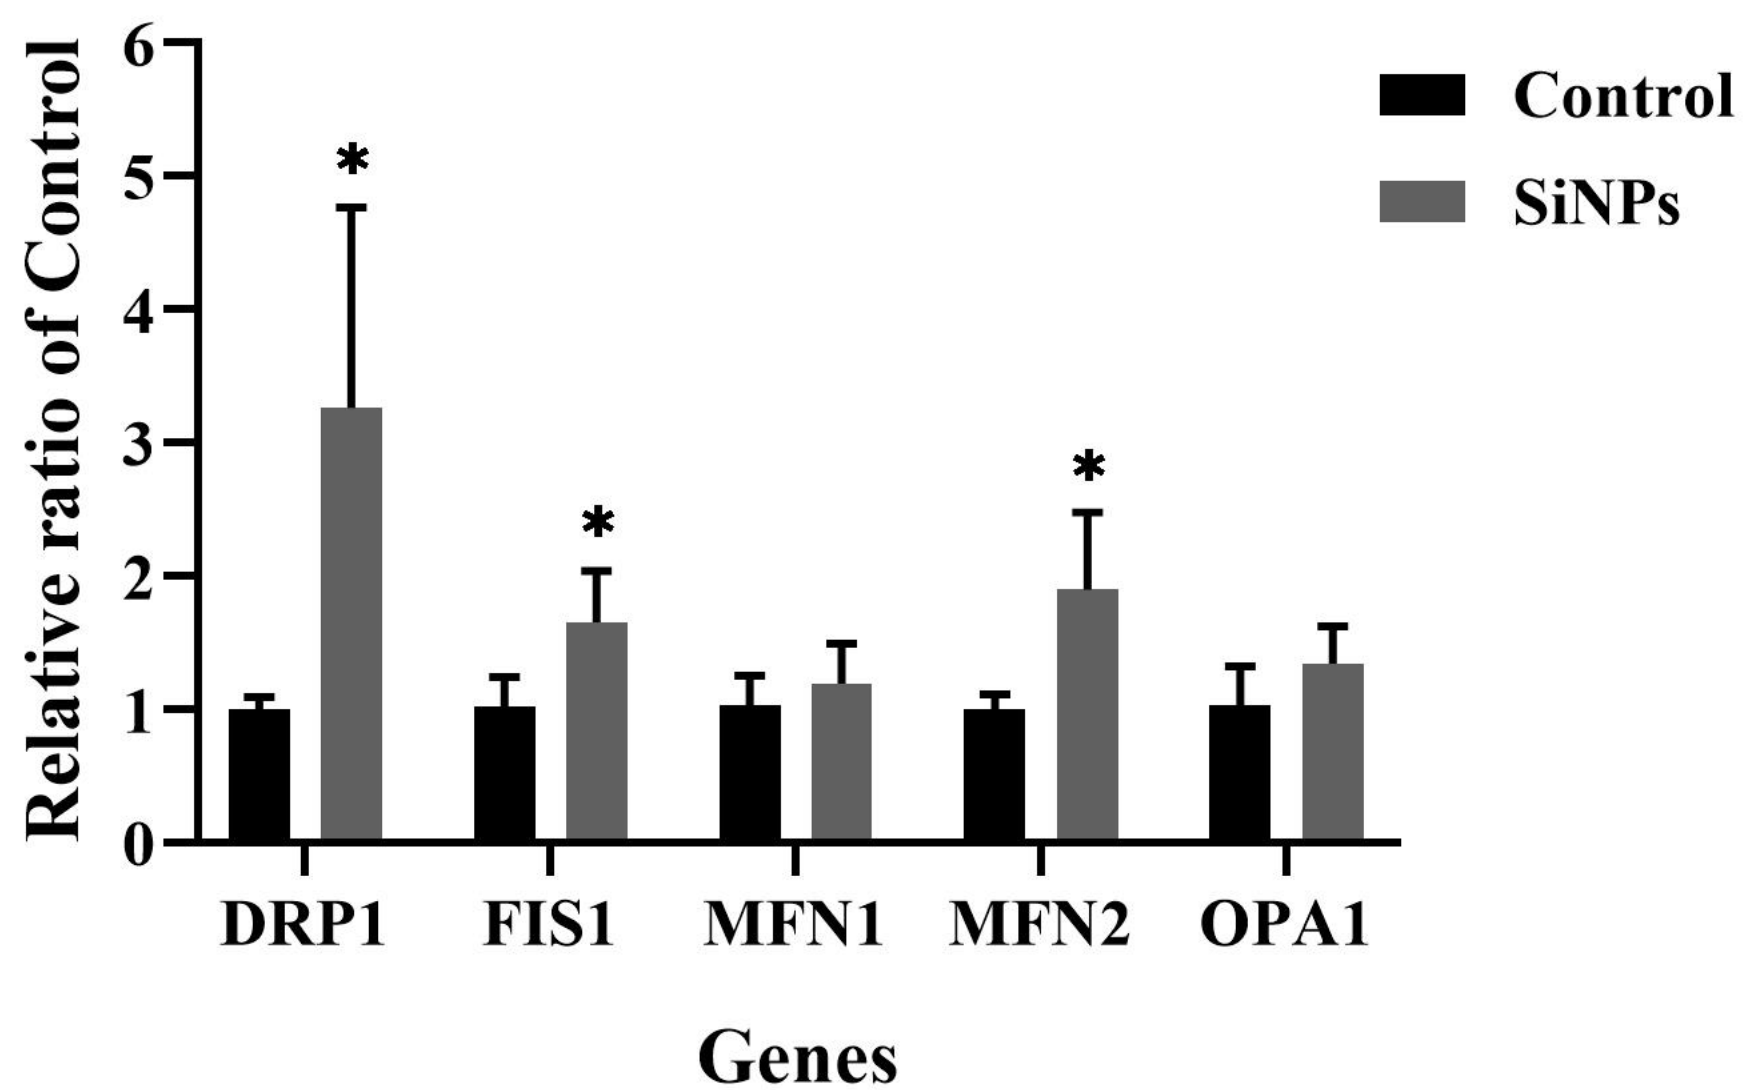

Fig. S2 qRT-PCR analysis of gene expressions related to mitochondrial dynamics in the rat liver tissue. Data are expressed as the mean  $\pm$  SD. n = 4, \* $p$  < 0.05 vs Control
